# Supplementary material for: Formation of stable polonium monolayers with tunable semiconducting properties driven by strong quantum size effects
Source: Royal Society of Chemistry journal article supplement (doi:10.1039/d2cp00070a), 2022-01-01
Supplement: d2cp00070a1.pdf [file d2cp00070a1.pdf]

## Supplementary Information

### Formation of Stable Polonium Monolayer with Tunable Semiconducting Property Driven by Strong Quantum Size Effects

Chunxiang Zhao<sup>1,3</sup>, Xiaolin Cai<sup>2</sup>, Xilai Liu<sup>1</sup>, Junfei Wang<sup>4</sup>, Weiguang Chen<sup>5</sup>, Liying Zhang<sup>3</sup>, Yinuo Zhang<sup>1,3</sup>, Zhili Zhu<sup>1</sup>, Chengyan Liu<sup>3</sup>, Chunyao Niu<sup>\*,1</sup>, Yu Jia<sup>3,1,6</sup>

<sup>1</sup>International Laboratory for Quantum Functional Materials of Henan, and School of Physics and Microelectronics, Zhengzhou University, Zhengzhou 450001, China

<sup>2</sup>School of Physics and Electronic Information Engineering, Henan Polytechnic University, Jiaozuo 454000, China

<sup>3</sup>Key Laboratory for Special Functional Materials of Ministry of Education, and School of Material Science and Engineering, Henan University, Kaifeng 475004, China

<sup>4</sup>College of Science, Henan University of Technology, Zhengzhou 450001, Henan, China

<sup>5</sup>School of Physics and Electrical Engineering, Zhengzhou Normal University, Zhengzhou 450001, China

<sup>6</sup>Key Laboratory for Quantum Materials Science, and Center for Topological Functional Materials, Henan University, Kaifeng 475004, China

## 1. Phonon band structures of polonene

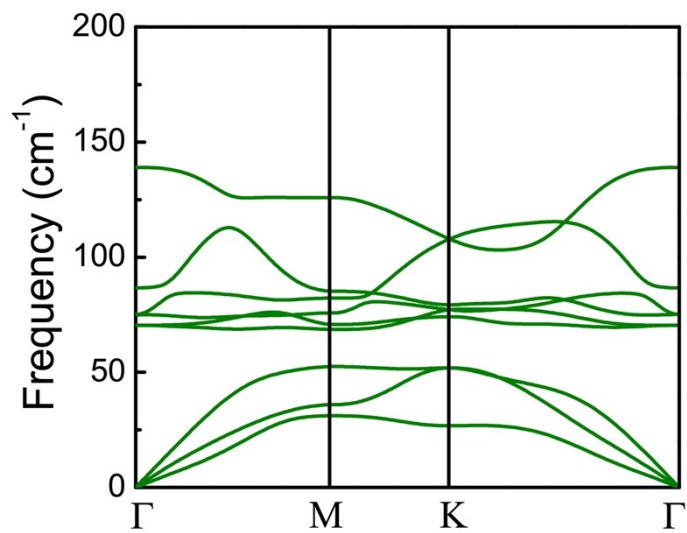

**Figure S1.** The calculated phonon band structure of polonene monolayer. There are no imaginary frequencies over the entire Brillouin zone (BZ), verifying its dynamic stability.

## 2. Ab initio molecular dynamics simulations

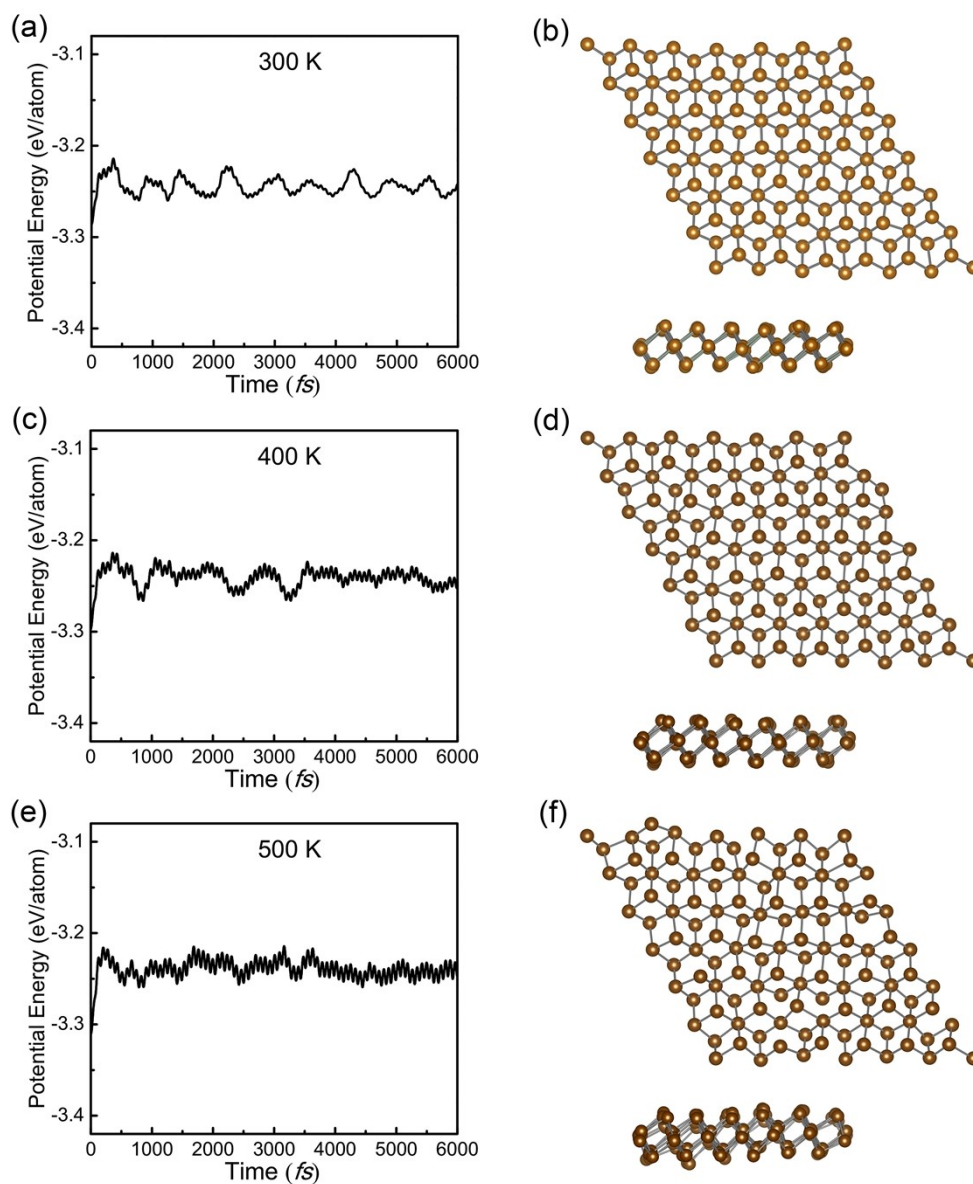

**Figure S2.** The potential energy fluctuations as a function of the molecular dynamic simulation step at (a)300, (c)400 and (e)500 K for polonene monolayer, respectively. The top and side views of polonene after *ab initio* MD simulations at (b)300, (d)400 and (f)500 K for 6ps in step of 2 fs, respectively. The potential energy fluctuation and structural changes of polonene are very small at both 300 and 400 K for 6 ps, while some structure disorders occur as the temperature increase to 500 K, indicating that it is thermally stable below the temperature of 400 K.

### 3. Lattice constants of Po films with different thicknesses

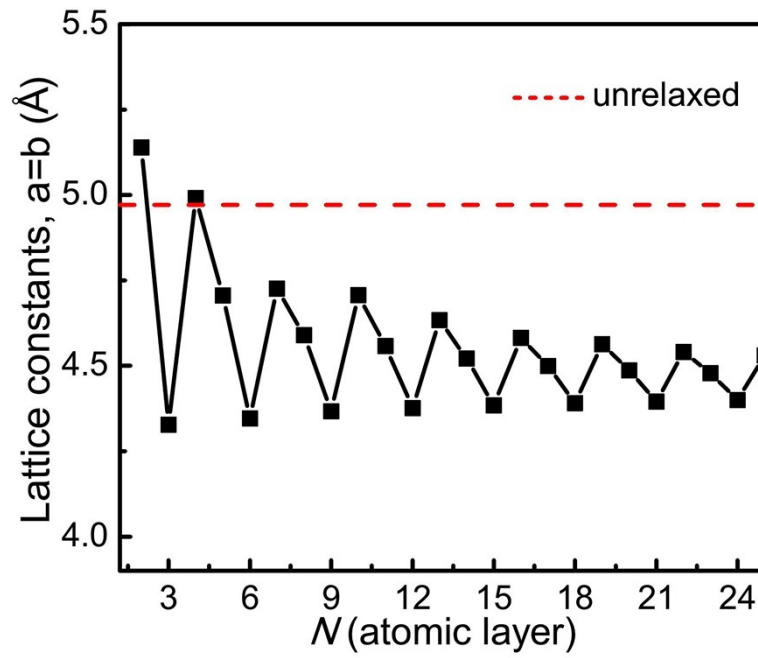

**Figure S3.** The calculated lattice constants in xy plane of the fully optimized bulk-truncated Po(001) films as a function of the film thickness, and the red dashed line corresponding to that of the unrelaxed  $\beta$ -Po(001) films.

#### 4. Electronic density of states for different Po films

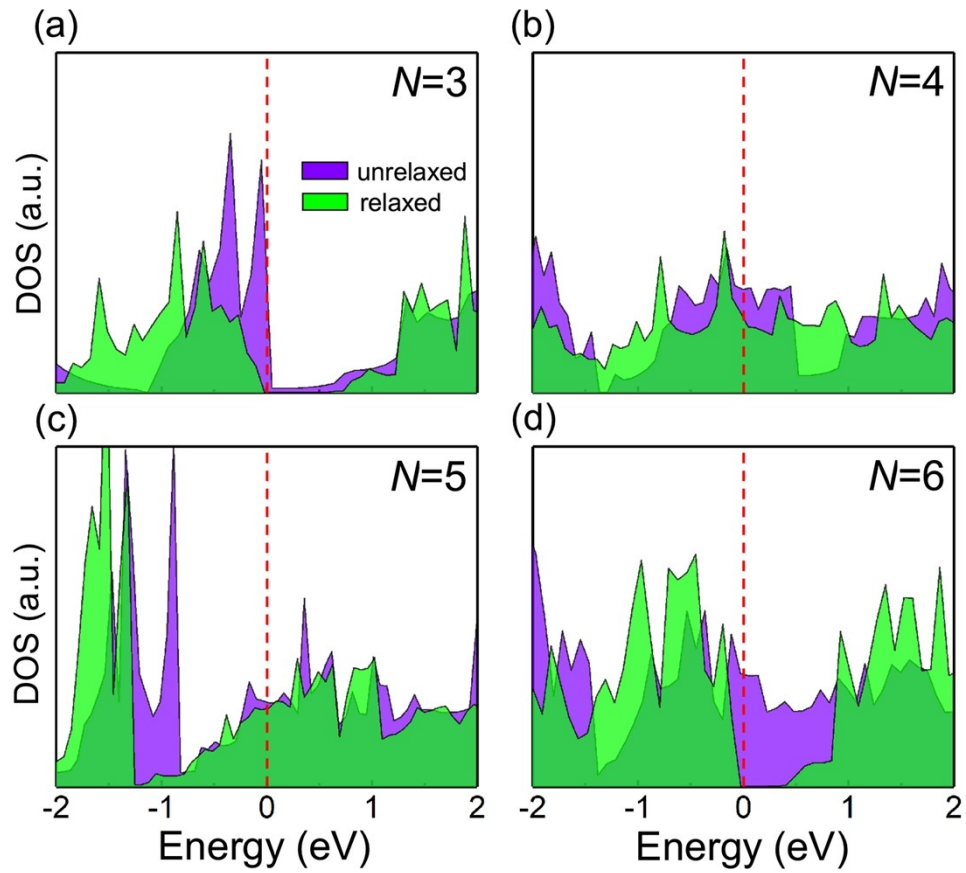

**Figure S4.** (a)-(d) The calculated electronic density of states for both unrelaxed (violet) and relaxed (green) Po films with thicknesses of  $N = 3, 4, 5$  and  $6$ , respectively.

## 5. The vibration modes

(a)

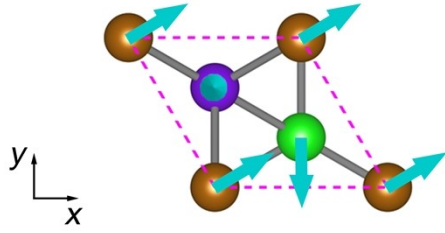

(b)

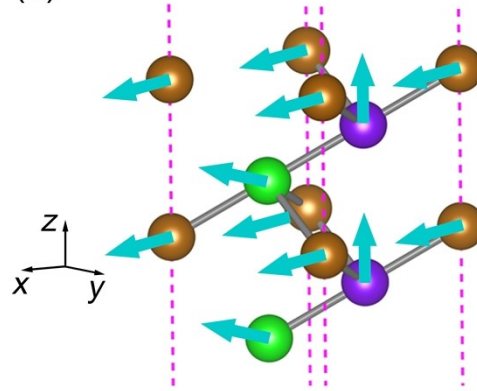

**Figure S5.** (a)-(b) The vibration modes of the unrelaxed  $\beta$ -Po(001) slab with thickness of  $N = 6$  from the top and perspective view, respectively. The cyan arrows indicate the vibration directions of atoms.

## 6. Pb films on the CdSe(111) substrate

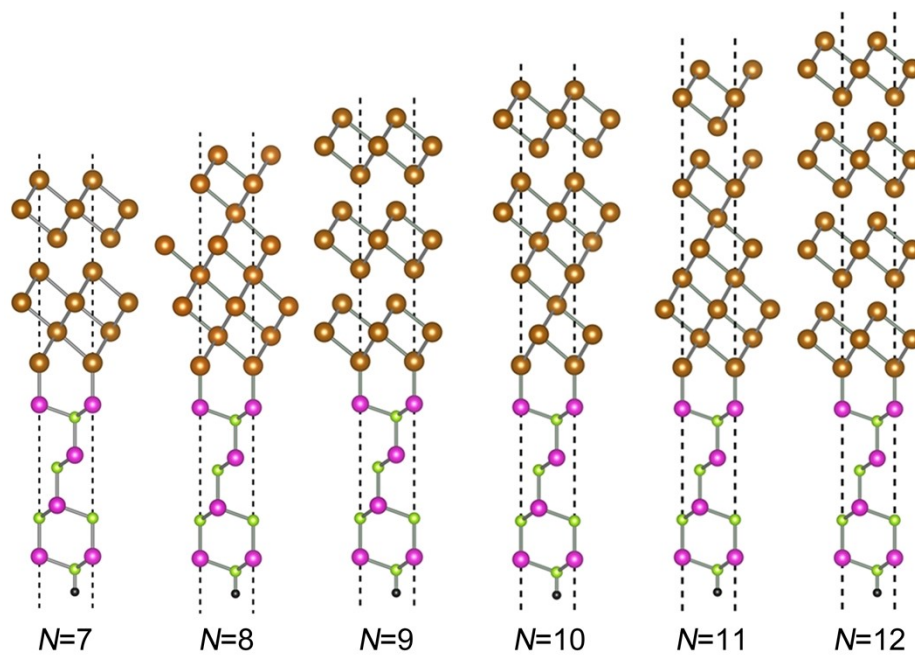

**Figure S6.** The relaxed geometric structures of Pb films with thicknesses from  $N = 7$  to 12 on the CdSe(111) substrate, respectively.
